# Supplementary material for: Risk of Dry Eye Syndrome in Patients with Orbital Fracture: A Nationwide Population-Based Cohort Study
Source: MDPI journal article supplement (doi:10.3390/healthcare9050605), 2021-05-18
Supplement: s1 [file s1]

## Supplementary

**Table S1. Years of follow-up**

| Orbital fracture | Min  | Median | Max   | Mean $\pm$ SD     |
|------------------|------|--------|-------|-------------------|
| With             | 0.01 | 6.97   | 15.95 | 10.29 $\pm$ 15.95 |
| Without          | 0.01 | 8.79   | 15.99 | 10.75 $\pm$ 9.91  |
| Total            | 0.01 | 7.15   | 15.99 | 10.66 $\pm$ 11.38 |

**Table S2. Years to dry eye syndrome**

| Orbital fracture | Min  | Median | Max   | Mean $\pm$ SD   |
|------------------|------|--------|-------|-----------------|
| With             | 0.01 | 3.72   | 11.94 | 4.13 $\pm$ 2.84 |
| Without          | 0.02 | 6.56   | 15.76 | 6.91 $\pm$ 4.57 |
| Total            | 0.01 | 5.50   | 15.76 | 6.14 $\pm$ 4.34 |

**Table S3. The incidence of DES in the orbital fracture group and in the general population group**

| Orbital fracture<br>In the tracking of x<br>year(s) | With (n =<br>46,179)<br>Numbers of dry eye syndrome | Without (n =<br>184,716) | Log-rank <i>p</i> |
|-----------------------------------------------------|-----------------------------------------------------|--------------------------|-------------------|
| 1                                                   | 14                                                  | 26                       | 0.598             |
| 2                                                   | 19                                                  | 39                       | 0.444             |
| 3                                                   | 28                                                  | 52                       | 0.036             |
| 4                                                   | 43                                                  | 64                       | <0.001            |
| 5                                                   | 52                                                  | 84                       | <0.001            |
| 6                                                   | 60                                                  | 99                       | <0.001            |
| 7                                                   | 67                                                  | 110                      | <0.001            |
| 8                                                   | 72                                                  | 123                      | <0.001            |
| 9                                                   | 74                                                  | 135                      | <0.001            |
| 10                                                  | 75                                                  | 145                      | <0.001            |
| 11                                                  | 78                                                  | 155                      | <0.001            |
| 12                                                  | 79                                                  | 167                      | <0.001            |
| 13                                                  | 79                                                  | 183                      | <0.001            |
| 14                                                  | 79                                                  | 192                      | <0.001            |
| 15                                                  | 79                                                  | 199                      | <0.001            |
| 16                                                  | 79                                                  | 206                      | <0.001            |
